# Supplementary material
Source: publisher figshare collection journal article supplement (https://tandf.figshare.com/ndownloader/files/21206232)
Supplement: Supplementary file 1 [file 21206232]

**SUPPLEMENTARY MATERIALS**

**Atmospheric pollution assessment near potential source of natural aerosols in the South Gobi Desert region, China**

Mikalai Filonchyk*, Volha Hurynovich

*Faculty of Geomatics, Lanzhou Jiaotong University, Lanzhou 730070, China.*

*Gansu Provincial Engineering Laboratory for National Geographic State Monitoring, Lanzhou 730070, China*

**Corresponding author. e-mail:* Mikalai Filonchyk: [*filonchyk.mikalai@gmail.com*](mailto:filonchyk.mikalai@gmail.com)


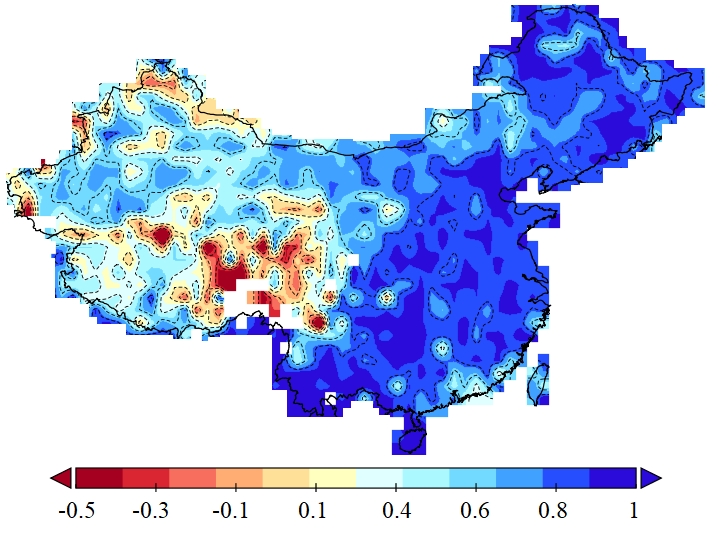


**Figure S1.** Spatial correlations between MODIS and MISR AOD.


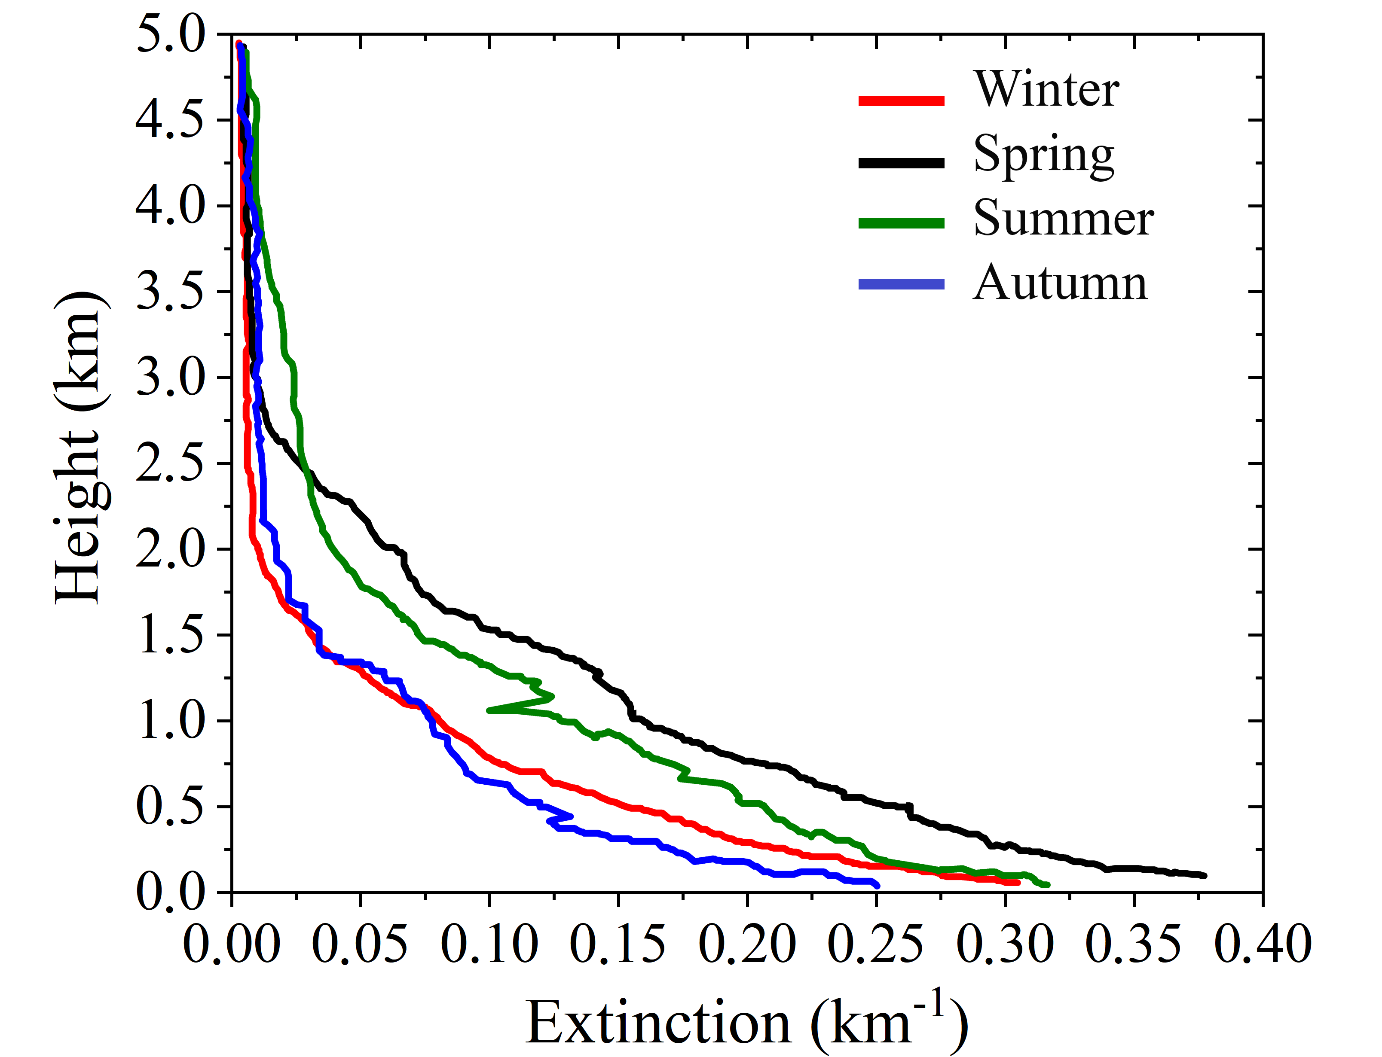


**Figure S2.** Vertical profiles of aerosol extinction from four seasons.

**Table S1**. The number of days in a year that exceed established class 1 standards for PM2.5 (35 µg/m3) and PM10 (50µg/m3).

| PM2.5 | Wuhai | Alashan | Wuzhong | Zhongwei | Wuwei | Jinchang | Zhangye |
| --- | --- | --- | --- | --- | --- | --- | --- |
| 2016 | 215 | 105 | 224 | 210 | 160 | 122 | 160 |
| 2017 | 233 | 133 | 187 | 146 | 208 | 102 | 116 |
| 2018 | 192 | 133 | 158 | 163 | 178 | 79 | 148 |
| PM10 |  |  |  |  |  |  |  |
| 2016 | 318 | 229 | 300 | 295 | 279 | 294 | 286 |
| 2017 | 319 | 225 | 329 | 302 | 318 | 266 | 227 |
| 2018 | 327 | 239 | 299 | 292 | 303 | 265 | 240 |

**Table S2.** Correlation between mass concentration of PM2.5 and PM10. (*p*<0.05)

|  | Wuhai | | Alashan | | Wuzhong | | Zhongwei | | Wuwei | | Jinchang | | Zhangye | | Average | |
| --- | --- | --- | --- | --- | --- | --- | --- | --- | --- | --- | --- | --- | --- | --- | --- | --- |
|  | PM2.5/PM10 | R | PM2.5/PM10 | R | PM2.5/PM10 | R | PM2.5/PM10 | R | PM2.5/PM10 | R | PM2.5/PM10 | R | PM2.5/PM10 | R | PM2.5/PM10 | R |
| January | 0.50 | 0.805 | 0.59 | 0.638 | 0.53 | 0.596 | 0.53 | 0.613 | 0.49 | 0.967 | 0.41 | 0.772 | 0.50 | 0.745 | 0.49 | 0.778 |
| February | 0.50 | 0.511 | 0.57 | 0.82 | 0.47 | 0.452 | 0.50 | 0.754 | 0.45 | 0.757 | 0.35 | 0.758 | 0.47 | 0.816 | 0.47 | 0.668 |
| March | 0.41 | 0.78 | 0.52 | 0.879 | 0.43 | 0.626 | 0.46 | 0.695 | 0.39 | 0.924 | 0.30 | 0.889 | 0.35 | 0.942 | 0.41 | 0.86 |
| April | 0.33 | 0.9 | 0.45 | 0.927 | 0.38 | 0.849 | 0.39 | 0.873 | 0.39 | 0.868 | 0.28 | 0.838 | 0.36 | 0.864 | 0.37 | 0.908 |
| May | 0.35 | 0.939 | 0.45 | 0.965 | 0.41 | 0.947 | 0.38 | 0.939 | 0.36 | 0.937 | 0.27 | 0.961 | 0.36 | 0.967 | 0.37 | 0.971 |
| June | 0.39 | 0.795 | 0.51 | 0.869 | 0.44 | 0.789 | 0.40 | 0.80 | 0.37 | 0.914 | 0.28 | 0.927 | 0.39 | 0.981 | 0.40 | 0.911 |
| July | 0.48 | 0.808 | 0.55 | 0.788 | 0.47 | 0.969 | 0.40 | 0.936 | 0.39 | 0.944 | 0.31 | 0.897 | 0.45 | 0.966 | 0.44 | 0.934 |
| August | 0.49 | 0.765 | 0.56 | 0.688 | 0.48 | 0.608 | 0.46 | 0.759 | 0.43 | 0.834 | 0.32 | 0.727 | 0.50 | 0.917 | 0.46 | 0.702 |
| September | 0.42 | 0.778 | 0.57 | 0.759 | 0.44 | 0.567 | 0.45 | 0.658 | 0.42 | 0.877 | 0.27 | 0.701 | 0.42 | 0.778 | 0.43 | 0.70 |
| October | 0.45 | 0.669 | 0.53 | 0.689 | 0.48 | 0.815 | 0.46 | 0.77 | 0.45 | 0.771 | 0.32 | 0.84 | 0.45 | 0.913 | 0.45 | 0.806 |
| November | 0.40 | 0.759 | 0.46 | 0.865 | 0.42 | 0.684 | 0.41 | 0.783 | 0.45 | 0.908 | 0.33 | 0.857 | 0.44 | 0.861 | 0.41 | 0.861 |
| December | 0.41 | 0.778 | 0.58 | 0.827 | 0.47 | 0.617 | 0.49 | 0.747 | 0.52 | 0.913 | 0.35 | 0.891 | 0.53 | 0.846 | 0.48 | 0.803 |
| Average | 0.43 | 0.766 | 0.53 | 0.875 | 0.45 | 0.738 | 0.44 | 0.785 | 0.42 | 0.892 | 0.32 | 0.863 | 0.44 | 0.865 | 0.43 | 0.842 |

**Table S3.** Mass concentration of PM10/PM2.5 (µg/m3) and PM2.5/PM10 ratio in the period of dust storms occurred on 3-5 May 2017 and 2-3 December 2018.

|  | Wuhai |  | Alashan |  | Wuzhong |  | Zhongwei |  | Wuwei |  | Jinchang |  | Zhangye |  |
| --- | --- | --- | --- | --- | --- | --- | --- | --- | --- | --- | --- | --- | --- | --- |
|  | PM2.5/PM10 | Ratio | PM2.5/PM10 | Ratio | PM2.5/PM10 | Ratio | PM2.5/PM10 | Ratio | PM2.5/PM10 | Ratio | PM2.5/PM10 | Ratio | PM2.5/PM10 | Ratio |
| 03.05.2017 | 159/711 | 0.22 | 98/369 | 0.27 | 109/349 | 0.31 | 192/765 | 0.25 | 92/305 | 0.30 | 245/1001 | 0.24 | 53/296 | 0.18 |
| 04.05.2017 | 253/1070 | 0.24 | 244/1054 | 0.23 | 326/818 | 0.40 | 187/548 | 0.34 | 137/339 | 0.40 | 114/522 | 0.22 | 51/227 | 0.22 |
| 05.05.2017 | 131/567 | 0.23 | 132/518 | 0.25 | 164/441 | 0.37 | 226/724 | 0.31 | 133/529 | 0.25 | 53/195 | 0.27 | 51/208 | 0.25 |
| 02.12.2018 | 96/623 | 0.15 | 136/777 | 0.18 | 159/1078 | 0.15 | 198/1130 | 0.18 | 271/1496 | 0.18 | 49/280 | 0.18 | 144/746 | 0.19 |
| 03.12.2018 | 40/224 | 0.18 | 60/216 | 0.28 | 92/439 | 0.21 | 121/488 | 0.25 | 108/406 | 0.27 | 27/128 | 0.21 | 49/170 | 0.29 |
